# Supplementary material for: Suppression of adiponectin receptor 1 promotes memory dysfunction and Alzheimer’s disease-like pathologies
Source: PubMed Central journal article supplement (PMC5622055; doi:10.1038/s41598-017-12632-9), 2017-09-29

# **Suppression of adiponectin receptor 1 promotes memory dysfunction and Alzheimer's disease-like pathologies**

Min Woo Kim<sup>1,‡</sup>, Noman bin Abid<sup>1, ‡</sup>, Myeong Hoon Jo<sup>1</sup>, Min Gi Jo<sup>1</sup>, Gwang Ho Yoon<sup>1</sup>, and Myeong Ok Kim<sup>1, \*</sup>

<sup>1</sup> Division of Life Science and Applied Life Science (BK 21 plus), College of Natural Sciences, Gyeongsang National University, Jinju, Republic of Korea

<sup>‡</sup> These authors contributed equally to this work.

**\* Correspondence:**

Prof. Myeong Ok Kim, Ph.D.

Head of Neuroscience Pioneer Research Center,

Head of Brain-Metabolic Neurodegenerative Disease Center,

Division of Life Science and Applied Life Science, College of Natural Sciences,

Gyeongsang National University, Jinju, 660-701, South Korea

Tel.: +82-55-772-1345

Fax: +82-55-772-1349

To whom correspondence should be addressed: E-mail: [mokim@gnu.ac.kr](mailto:mokim@gnu.ac.kr)

**A**

**Proteinopathies**

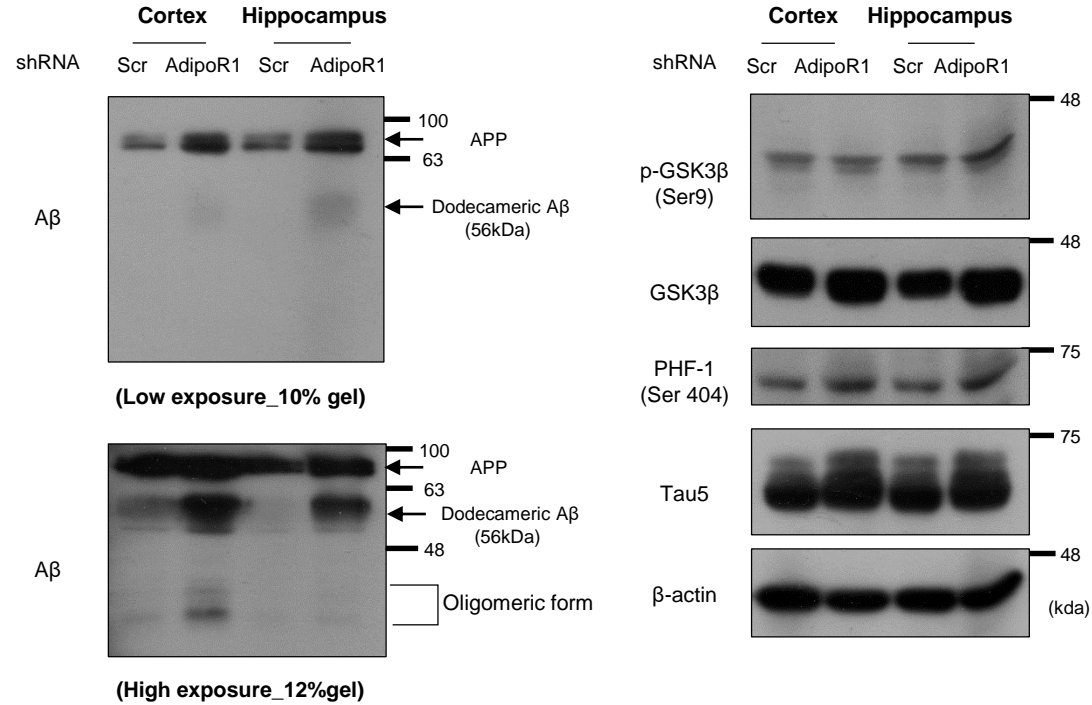

**B**

**Neuroinflammation**

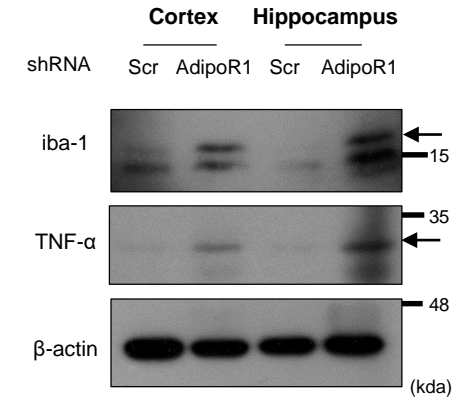

**Supplementary figure. 1** AD-like pathologies in AKD mice (A). Oligomeric Aβ, GSK3β and hyperphosphorylated tau expression in the AKD mice. (B) Neuroinflammatory marker including iba-1 and TNF-α in the AKD mice

Complete Immunoblots:

Figure 1a

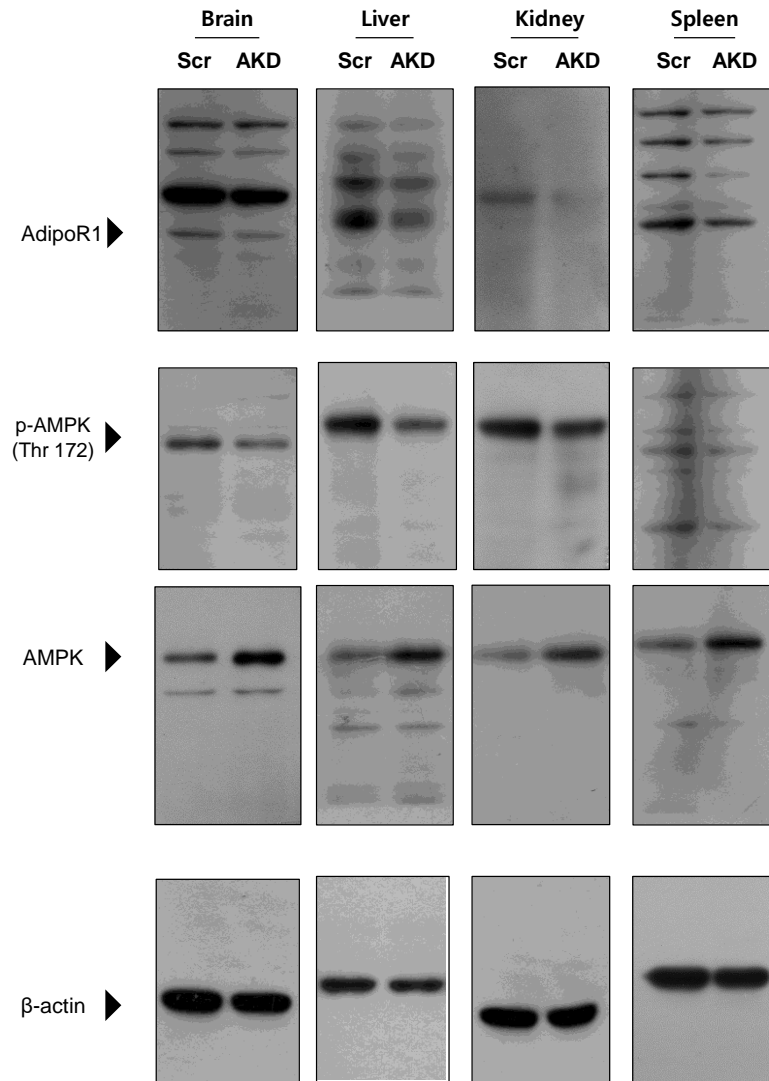

Figure 1b

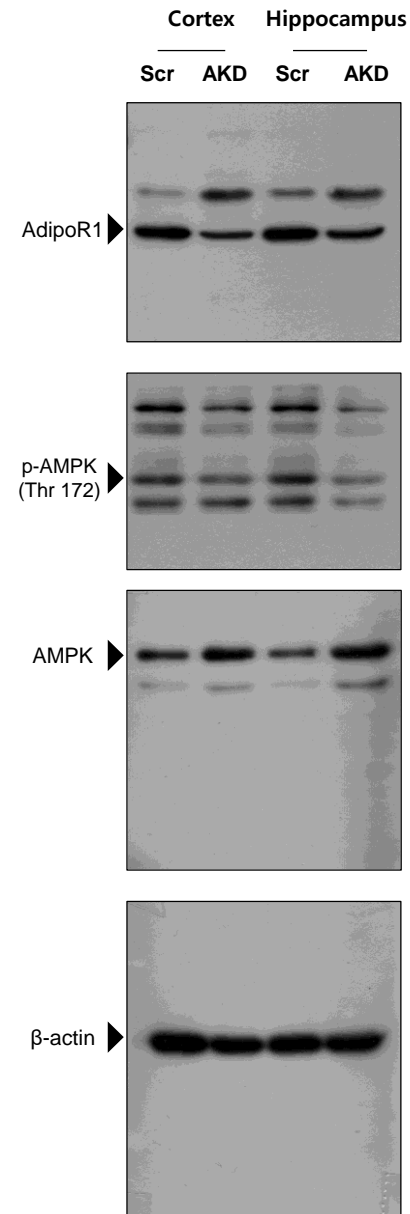

Figure 1c

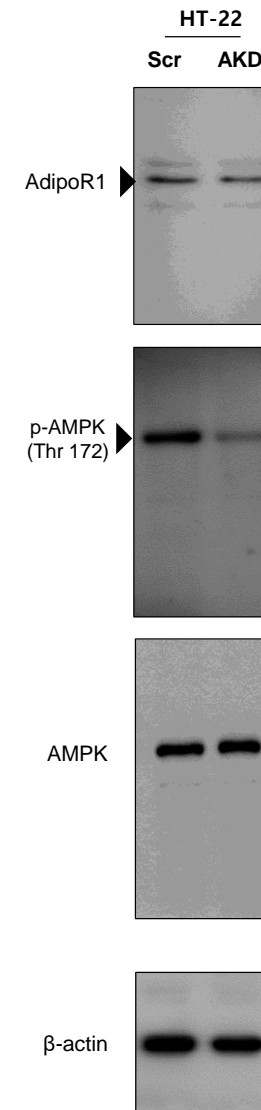

Figure 5c

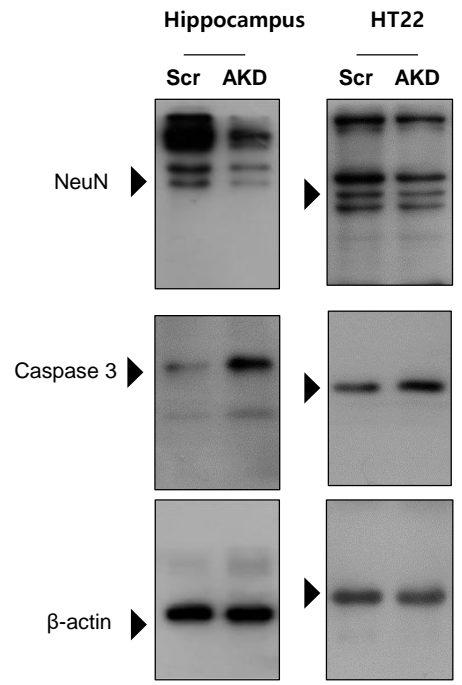

Figure 6a

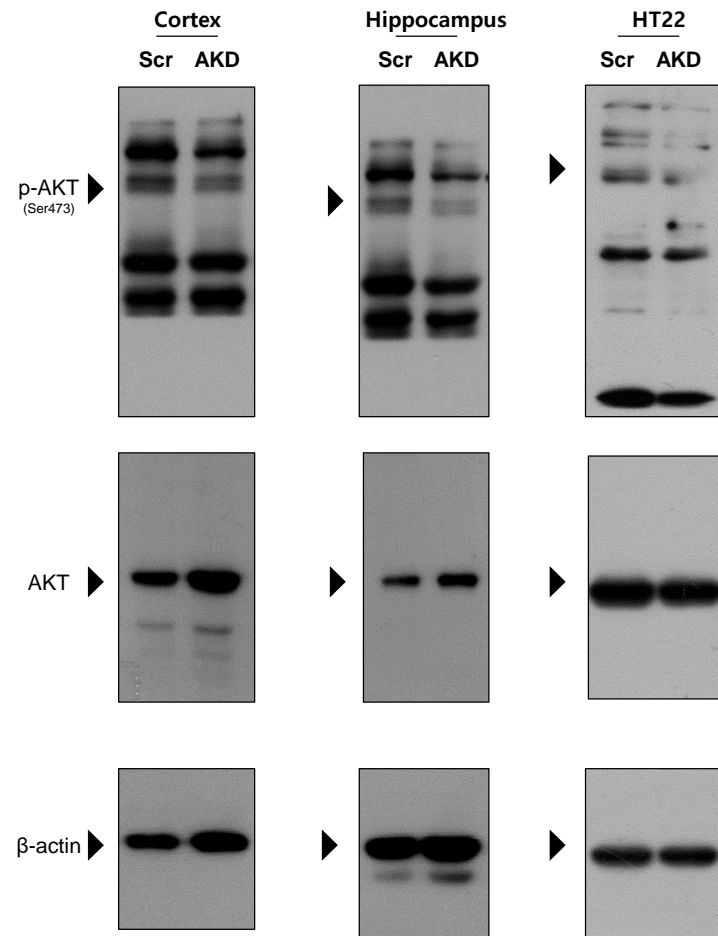

Figure 6c

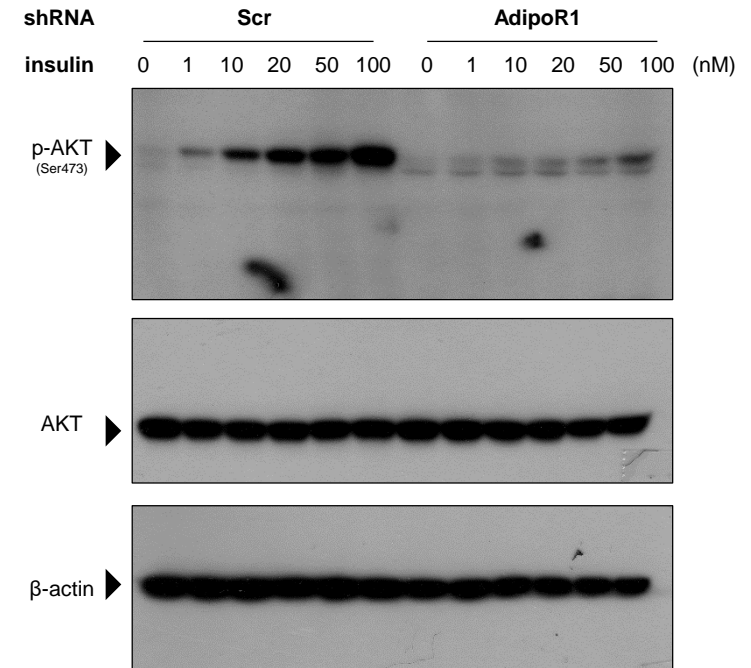

Supplementary fig. 1a

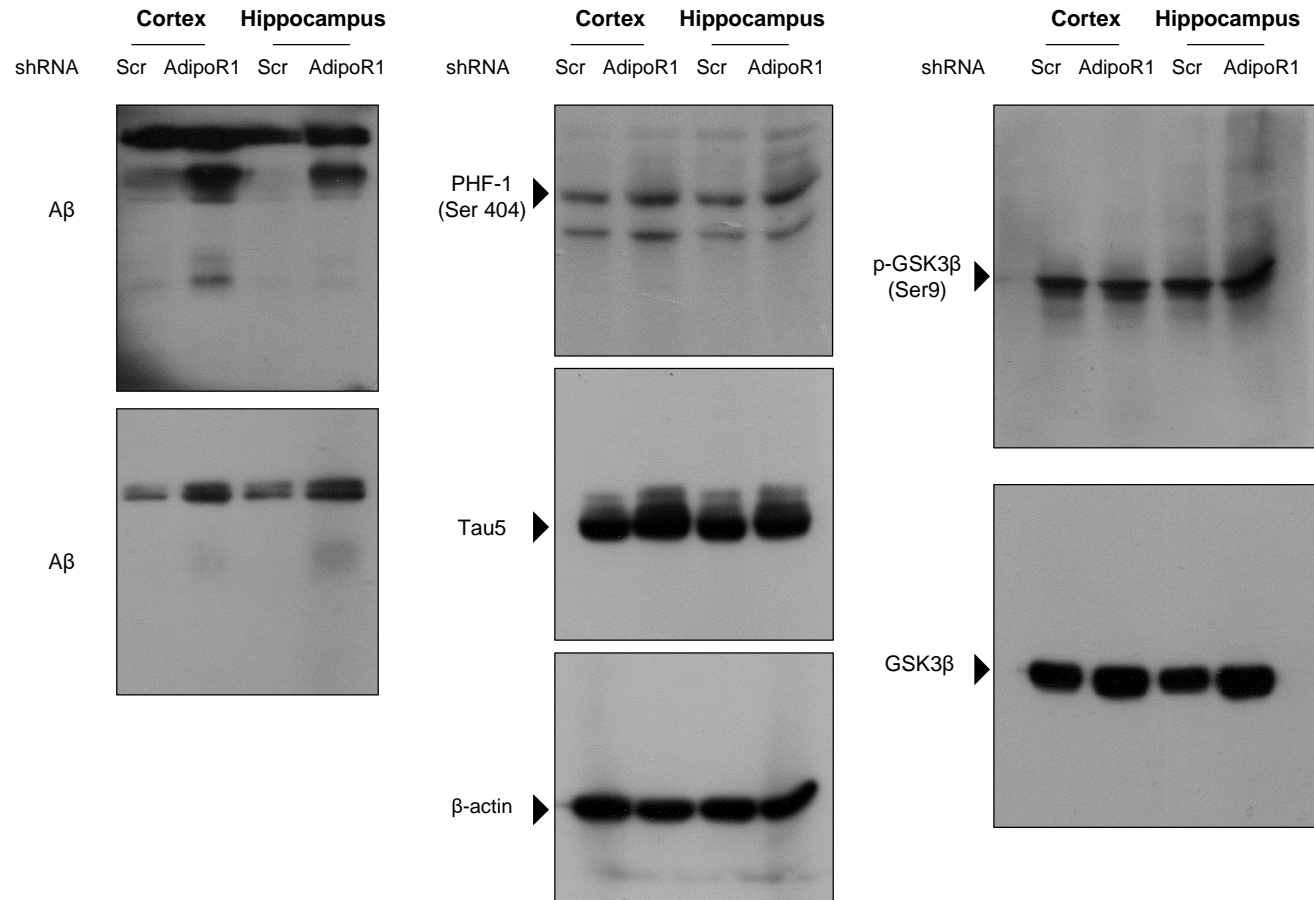

Supplementary fig. 1b

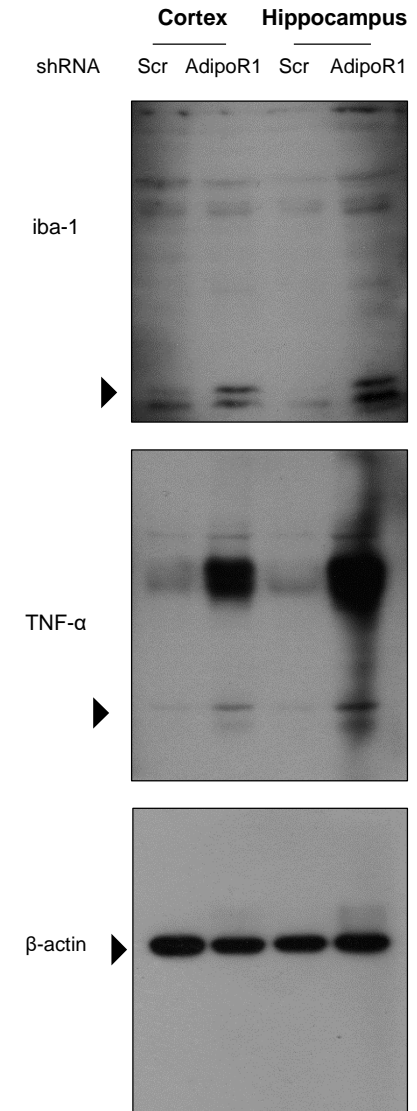

Supplement: 41598_2017_12632_MOESM1_ESM.pdf [file 41598_2017_12632_MOESM1_ESM.pdf]
